# Supplementary material for: An aerobic oxidation/homolytic substitution-cascade for stereoselective methylsulfanyl-cyclization of 4-pentenols
Source: Royal Society of Chemistry journal article supplement (doi:10.1039/c3ob26590k), 2013-01-01
Supplement: c3ob26590k.pdf [file c3ob26590k.pdf]

*Electronic Supporting Information for*

# **Stereoselective Methylsulfanyl-Cyclization of 4-Pentenols via Aerobic Oxidation/Homolytic Substitution-Cascades**

Patrick Fries, Melanie Kim Müller, and Jens Hartung\*

*Fachbereich Chemie, Technische Universität Kaiserslautern,  
Erwin-Schrödinger-Straße, D-67663 Kaiserslautern, Germany*

## **Contents**

|    |                                                              |     |
|----|--------------------------------------------------------------|-----|
| 1  | General Remarks .....                                        | S1  |
| 2  | Instrumentation and Reagent Specification.....               | S2  |
| 3  | Cobalt Complexes and Alkenols .....                          | S4  |
| 4  | Oxidation – Radical Substitution Cascades.....               | S6  |
| 5  | 5-Phenyltetrahydrofuryl-2-methyl methyl sulfoxide.....       | S13 |
| 6  | 5-Phenyltetrahydrofuryl-2-methyl methyl sulfone.....         | S14 |
| 7  | Library of carbon-13 NMR spectra of selected compounds ..... | S15 |
| 8. | References .....                                             | S23 |

## **1 General Remarks**

(i) The compound numbering in the Electronic Supporting information is consistent with the accompanying publication. (ii) References refer exclusively to the Electronic Supporting Information.

## 2 Instrumentation and Reagent Specification

$^1\text{H}$ -,  $^{13}\text{C}$ - and  $^{19}\text{F}$ -NMR spectra were recorded with FT-NMR DPX 400 and DMX 600 instruments (*Bruker*). Chemical shifts refer to the  $\delta$ -scale (coupling constants  $J$  are given in Hz). The resonances of residual protons and the corresponding carbons of deuterated solvents ( $\text{CDCl}_3$ :  $\delta_{\text{H}}$  7.26,  $\delta_{\text{C}}$  77.0) were used as internal standards for  $^1\text{H}$ -, and  $^{13}\text{C}$ -NMR.  $^{19}\text{F}$ -NMR chemical shifts were referenced versus  $\alpha,\alpha,\alpha$ -Trifluorotoluene ( $\delta_{\text{F}}$  -63.72) as internal standard.

GC/MS Analysis were performed with a HP 6890 Series (*Hewlett Packard*) with a ZB5 column (*Phenomenex*, 30 m  $\times$  0.25 mm, 0.25  $\mu\text{m}$ ). Temperature program: 40  $^\circ\text{C}$  (3 min), linear temperature rise (10  $^\circ\text{C min}^{-1}$ ) to 280  $^\circ\text{C}$ , final temperature 280  $^\circ\text{C}$  (10 min). Mass spectra (EI, 70 eV) were recorded with a Mass Selective Detector HP 6890 (*Hewlett Packard*).

Electrospray ionization mass spectrometry (ESI-MS) was performed with a *Bruker amazonX ion trap instrument*. The ion source was used in positive and negative electrospray ionization mode. Scan speed was 32500  $m/z \text{ s}^{-1}$  in ultra scan mode (0.3 FWHM /  $m/z$ ), 4650  $m/z \text{ s}^{-1}$  in maximum resolution (<0.1 FWHM /  $m/z$ ) scan range was 70 to 2200  $m/z$ . Sample solutions in acetonitrile at concentrations of approx. 0.4  $\mu\text{M}$  were continuously infused into the ESI chamber at a flow rate of 2  $\mu\text{L}/\text{min}$  using a syringe pump. Nitrogen was used as drying gas with flow rate of 3.0 L/min at 220  $^\circ\text{C}$ . The solutions were sprayed at a nebulizer pressure of 4 psi (275.8 mbar) and the electrospray needle was typically held at 4.5 kV. The instrument was controlled by *Bruker Trap Control 7.0 software*. Data analysis was performed using *Bruker Data Analysis 4.0 software*.

Combustion analyses were performed with a vario Micro cube CHNS (*Elementar Analysentechnik / Hanau*).

Reaction progress was monitored via thin layer chromatography (TLC) on aluminium sheets coated with silica gel (60 F<sub>254</sub>, *Machery-Nagel*). Compounds were detected by UV-light (254 nm) or by staining of developed TLC sheets with Ekkert's reagent.

IR spectra were recorded from pelletized samples in KBr using a FT-IR 1000 spectrometer (*Perkin Elmer*).

All solvents were purified according to standard procedures.<sup>1</sup>

1-Phenylpent-4-en-1-ol (**1a**),<sup>2,3</sup> (*E*)-Methyl 6-hydroxy-6-phenylhex-2-enoate (**1b**),<sup>4</sup> 1-phenylhex-4-en-1-ol (**1c**),<sup>5</sup> *cis*-2-allylcyclopentanol (**1d**),<sup>6</sup> *cis*-2-allylcyclohexanol (**1e**),<sup>7</sup> *rel*-(1*S*,2*R*)-1,2-diphenylpent-4-en-1,2-diol (**1f**),<sup>8</sup> 2-phenylpent-4-en-1-ol (**1g**),<sup>9</sup> *rel*-(1*S*,2*S*)-1-phenylpent-4-en-1,2-diol (**1h**)<sup>10</sup>, and *rel*-(1*R*,2*R*)-1,2-diphenylpent-4-en-1-ol (**1i**)<sup>11</sup> were prepared according to published procedures.

### 3 Cobalt Complexes and Alkenols

All cobalt complexes were prepared as reported previously.<sup>12</sup>

#### 3.1.1 Bis-[1,1,1-trifluoro-4-phenyl-2-(oxo- $\kappa O$ )-but-3-en-4(olato- $\kappa O$ )]cobalt(II)

**dihydrate (4).** Yellow solid (99 %),  $\nu_{\max}$  (KBr) /  $\text{cm}^{-1}$  3383 (OH), 1608 (CO), 1574, 1535, 1490, 1460, 1433, 1288, 1252, 1186, 1163, 1132, 1077, 1026;  $\delta_{\text{F}}$  ( $\text{CDCl}_3$ /acetone, 377 MHz) +6.1. Found C, 45.97; H, 3.16.  $\text{C}_{20}\text{H}_{16}\text{CoF}_6\text{O}_6$  (525.26) requires C, 45.73; H, 3.07 %. ESI-MS: Found: 511.94 [ $\text{CoL}^1_2+\text{Na}^+$ ],  $\text{C}_{20}\text{H}_{12}\text{CoF}_6\text{NaO}_4$  requires 511.99.

#### 3.1.2 Bis-[1-(4-fluorophenyl)-3-(oxo- $\kappa O$ )-but-1-en-1(olato- $\kappa O$ )]cobalt(II) dihydrate

**(5).** Yellow solid (84 %),  $\nu_{\max}$  (KBr) /  $\text{cm}^{-1}$  3391 (OH), 1603 (CO), 1572, 1523, 1499, 1417, 1388, 1297, 1233, 1157, 1163, 1110, 1011;  $\delta_{\text{F}}$  ( $\text{CDCl}_3$ /acetone, 377 MHz) -112.0. Found C, 53.33; H, 4.92.  $\text{C}_{20}\text{H}_{20}\text{CoF}_2\text{O}_6$  (453.30) requires C, 52.99; H, 4.45 %. ESI-MS: Found: 439.99 [ $\text{CoL}^2_2+\text{Na}^+$ ],  $\text{C}_{20}\text{H}_{16}\text{CoF}_2\text{NaO}_4$  requires 440.02.

#### 3.1.3 Bis-[1,1,1-trifluoro-4-(4-fluorophenyl)-2-(oxo- $\kappa O$ )-but-3-en-4(olato- $\kappa O$ )]-

**cobalt(II)  $\times$  2 EtOH (6).** Orange solid (89 %),  $\nu_{\max}$  (KBr) /  $\text{cm}^{-1}$  3399 (OH), 1616 (CO), 1584, 1535, 1546, 1504, 1458, 1312, 1288, 1239, 1184, 1137, 1061, 1013;  $\delta_{\text{F}}$  ( $\text{CDCl}_3$ /acetone, 377 MHz) +6.7, -107.0. Found C, 46.68; H, 3.78.  $\text{C}_{24}\text{H}_{22}\text{CoF}_8\text{O}_6$  (617.35) requires C, 46.69; H, 3.59 %. ESI-MS: Found: 547.93 [ $\text{CoL}^3_2+\text{Na}^+$ ],  $\text{C}_{20}\text{H}_{10}\text{CoF}_8\text{NaO}_4$  requires 547.97.

#### 3.1.4 Bis-[1,3-di(4-fluorophenyl)-3-(oxo- $\kappa O$ )-prop-1-en-1(olato- $\kappa O$ )]cobalt(II) $\times$ 2

**EtOH (7).** Yellow solid (76 %),  $\nu_{\max}$  (KBr) /  $\text{cm}^{-1}$  3367 (OH), 1600 (CO), 1574, 1553, 1527, 1491, 1433, 1387, 1300, 1218, 1157, 1096, 1051, 1012;  $\delta_{\text{F}}$  ( $\text{CDCl}_3$ /acetone, 377 MHz) -110.9. Found C, 61.23; H, 4.60.  $\text{C}_{34}\text{H}_{30}\text{CoF}_4\text{O}_6$  (669.53) requires C, 60.99; H, 4.52 %. ESI-MS: Found: 600.13 [ $\text{CoL}^4_2+\text{Na}^+$ ],  $\text{C}_{30}\text{H}_{18}\text{CoF}_4\text{NaO}_4$  requires 600.04.

#### 3.2.1 *rel*-(1*R*,2*R*)-1,2-Diphenylhex-5-en-1-ol (15)

A solution of *trans* stilbene oxide (1.01 g, 5.10 mmol) in dry  $\text{Et}_2\text{O}$  (15 mL) was added in an atmosphere of nitrogen in a dropwise manner to a solution of but-4-en-1-yl magnesium bromide prepared from 4-bromo-1-butene (1.43 g [97 %], 10.3 mmol) and

magnesium (339 mg, 14.0 mmol) in dry Et<sub>2</sub>O (15 mL). The reaction mixture was stirred for 17 h at 22 °C and successively treated with satd. aqueous NH<sub>4</sub>Cl (20 mL) and aqueous 1 M HCl (10 mL). The organic layer was separated and the aqueous layer extracted with Et<sub>2</sub>O (3 × 15 mL). Combined organic phases were dried (MgSO<sub>4</sub>) and concentrated under reduced pressure. The oily residue was purified by column chromatography [SiO<sub>2</sub>, acetone/pentane = 1/10, (v/v)]. Yield: 522 mg (2.07 mmol, 41 %), *R<sub>f</sub>* 0.41 [SiO<sub>2</sub>, acetone/pentane = 1:5 (v/v)], colorless oil.  $\delta_{\text{H}}$  (600 MHz, CDCl<sub>3</sub>) 1.46–1.53 (1 H, m), 1.57–1.65 (2 H, m), 2.13–2.21 (1 H, m), 2.26–2.33 (1 H, m), 3.89 (1 H, d, *J* 8.6), 4.37 (1 H, td, *J<sub>t</sub>* 8.6, *J<sub>d</sub>* 2.6), 4.95 (1 H, d, *J* 10.3), 5.01 (1 H, dd, *J* 17.0, 1.8), 5.78 (1 H, ddt, *J<sub>d</sub>* 17.0, 10.3, *J<sub>t</sub>* 6.8), 7.18–7.25 (3 H, m), 7.27–7.34 (5 H, m) 7.37–7.41 (2 H, m).  $\delta_{\text{C}}$  (100 MHz, CDCl<sub>3</sub>) 30.1, 34.1, 58.9, 73.1, 114.8, 126.5, 126.9, 128.2, 128.6, 128.7, 128.8, 129.0, 129.1, 138.4, 141.3, 142.2.

## 4 Oxidation – Radical Substitution Cascades

### 4.1 Oxidation of 1-phenylpent-4-en-1-ol (**1a**)

#### 4.1.1 Trapping with methyl disulfide

A solution of alcohol **1a** (163 mg, 1.01 mmol) and cobalt catalyst **5** (22.9 mg, 50.5  $\mu\text{mol}$ ) in methyl disulfide (9.5 mL) and CHD (1.0 mL) was stirred at 70 °C for 6 h, while being exposed to laboratory atmosphere. The reaction mixture was cooled to 20 °C and concentrated under reduced pressure to afford a residue that was purified by column chromatography [ $\text{SiO}_2$ ,  $\text{Et}_2\text{O}$ /pentane = 1:10 (v/v)].

**trans-2-(methylsulfanyl)methyl-5-phenyltetrahydrofuran (3a)**. Yield: 151 mg (726  $\mu\text{mol}$ , 72 %),  $R_f$  0.50 [ $\text{SiO}_2$ , acetone/pentane = 1:5 (v/v)], colorless oil.  $\delta_{\text{H}}$  (600 MHz,  $\text{CDCl}_3$ ) 1.84–1.94 (2 H, m), 2.20–2.25 (1 H, m), 2.22 (3 H, s,  $\text{CH}_3$ ), 2.39–2.43 (1 H, m), 2.70 (1 H, dd,  $J$  13.3, 6.7), 2.82 (1 H, dd,  $J$  13.3, 5.4), 4.45 (1 H, quin,  $J$  6.4), 5.07 (1 H, t,  $J$  6.9), 7.25–7.27 (1 H, m), 7.33–7.36 (4 H, m). NOESY 2-H || 5-H.  $\delta_{\text{C}}$  (100 MHz,  $\text{CDCl}_3$ ) 16.5 ( $\text{CH}_3$ ), 31.7, 35.2, 39.6, 79.2, 80.8, 125.5, 127.1, 128.3, 143.3. GC-MS (EI, 70 eV)  $m/z$  (%) 208 (39,  $\text{M}^+$ ), 147 (100), 129 (63), 117 (20), 105 (31), 91 (94), 77 (25). HRMS (EI<sup>+</sup>)  $m/z$  208.0921 ( $\text{M}^+$ ); calculated mass for  $\text{C}_{12}\text{H}_{16}\text{OS}^+$ : 208.0922.

**trans-2-methyl-5-phenyltetrahydrofuran (8a)**. Yield: 16.2 mg (100  $\mu\text{mol}$ , 10 %). Analytical data agree with published values.<sup>2</sup>

#### 4.1.2 Trapping with ethyl disulfide

A solution of alcohol **1a** (163 mg, 1.00 mmol) and cobalt catalyst **5** (22.7 mg, 50.1  $\mu\text{mol}$ ) in diethyl disulfide (2.49 g, 20.2 mmol) and CHD (0.5 mL) was stirred at 70 °C for 16 h, while being exposed to laboratory atmosphere. The reaction mixture was cooled to 20 °C and purified by column chromatography [ $\text{SiO}_2$ ,  $\text{Et}_2\text{O}$ /pentane = 1:10 (v/v)].

**trans-2-(ethylsulfanyl)methyl-5-phenyltetrahydrofuran (11)**. Yield: 80.6 mg (363  $\mu\text{mol}$ , 36 %),  $R_f$  0.50 [ $\text{SiO}_2$ , acetone/pentane = 1:5 (v/v)], colorless oil.  $\delta_{\text{H}}$  (400 MHz,  $\text{CDCl}_3$ ) 1.28 (3 H, t,  $J$  7.4), 1.79–1.93 (2 H, m), 2.17–2.26 (1 H, m), 2.35–2.43 (1 H, m), 2.64 (2 H, q,  $J$  7.4), 2.70 (1 H, dd,  $J$  13.3, 7.0), 2.84 (1 H, dd,  $J$  13.3, 5.3),

4.41 (1 H, quin,  $J$  6.4), 5.05 (1 H, t,  $J$  7.0), 7.21–7.28 (1 H, m), 7.31–7.38 (4 H, m).  $\delta_C$  (100 MHz,  $CDCl_3$ ) 14.9, 26.8, 31.8, 35.2, 37.1, 79.4, 80.8, 125.5, 127.1, 128.3, 143.3. GC-MS (EI, 70 eV)  $m/z$  (%) 222 (17,  $M^+$ ), 161 (5), 147 (100), 129 (53), 117 (24), 105 (41), 91 (87), 77 (40). HRMS (EI<sup>+</sup>)  $m/z$  222.1080 ( $M^+$ ); calculated mass for  $C_{13}H_{18}OS^+$ : 222.1078.

***trans*-2-methyl-5-phenyltetrahydrofuran (8a)**. Yield: 63.8 mg (393  $\mu$ mol, 39 %). Analytical data agree with published values.<sup>2</sup>

#### 4.1.3 Trapping with allyl disulfide

A solution of alcohol **1a** (163 mg, 1.00 mmol) and cobalt catalyst **5** (22.8 mg, 50.1  $\mu$ mol) in diallyl disulfide (2.50 mL [80 %], 13.7 mmol) and CHD (0.5 mL) was stirred at 70 °C for 16 h, while being exposed to laboratory atmosphere. The reaction mixture was cooled to 20 °C and purified by column chromatography [ $SiO_2$ ,  $Et_2O$ /pentane = 1:10 (v/v)].

***trans*-2-(but-1'-en-4'-yl)-5-phenyltetrahydrofuran (13)**. Yield: 43.7 mg (216  $\mu$ mol, 22 %),  $R_f$  0.64 [ $SiO_2$ , acetone/pentane = 1:5 (v/v)], colorless oil.  $\delta_H$  (400 MHz,  $CDCl_3$ ) 1.58–1.71 (2 H, m), 1.75–1.91 (2 H, m), 2.10–2.19 (2 H, m), 2.33–2.41 (1 H, m), 4.21 (1 H, ddt,  $J_d$  7.5, 6.8,  $J_t$  6.2), 4.95–5.02 (2 H, m), 5.06 (1 H, dq,  $J_d$  17.1,  $J_q$  1.7), 5.87 (1 H, ddt,  $J_d$  17.1, 10.3,  $J_t$  6.6), 7.21–7.35 (5 H, m).  $\delta_C$  (100 MHz,  $CDCl_3$ ) 30.4, 32.3, 35.3, 35.4, 79.4, 80.1, 114.5, 125.5, 127.0, 128.3, 138.5, 143.9. GC-MS (EI, 70 eV)  $m/z$  (%) 202 (19,  $M^+$ ), 187 (6), 173 (8), 160 (11), 147 (65), 129 (42), 117 (40), 105 (100), 91 (89), 77 (33). HRMS (EI<sup>+</sup>)  $m/z$  202.1358 ( $M^+$ ); calculated mass for  $C_{14}H_{18}O^+$ : 202.1358.

Another fraction of a colorless oil was obtained (106 mg)  $R_f$  0.52 [ $SiO_2$ , acetone/pentane = 1:5 (v/v)], which consisted of ***trans*-2-methyl-5-phenyltetrahydrofuran (8a)** (145  $\mu$ mol, 14 %), ***trans*-2-(allylsulfanyl)-methyl-5-phenyltetrahydrofuran (12)** (241  $\mu$ mol, 24 %), [ $\delta_H$  (400 MHz,  $CDCl_3$ ) 2.64 (1 H, dd,  $J$  13.4, 6.6), 2.77 (1 H, dd,  $J$  13.4, 5.7), 3.18–3.28 (2 H, m), 4.40 (1 H, quin,  $J$  6.4), 5.04 (1 H, t,  $J$  7.0), 5.09–5.16 (1 H, m), 5.87 (1 H, ddt,  $J_d$  17.0, 9.9,  $J_t$  7.3), 5.82 (1 H, ddt,  $J_d$  17.0, 9.9,  $J_t$  7.2); GC-MS (EI, 70 eV)  $m/z$  (%) 234 (3,  $M^+$ ), 193 (18), 160 (15), 147 (96), 129 (56), 117 (21), 105 (52), 91 (100), 77 (27). HRMS (EI<sup>+</sup>)  $m/z$  234.1083 ( $M^+$ ); calculated mass for  $C_{14}H_{18}OS^+$ : 234.1078.] and ***trans*-(5'-phenyltetrahydrofuryl)-methyl allyl disulfide (14)** (96.4  $\mu$ mol, 10 %), [ $\delta_H$  (400 MHz,  $CDCl_3$ ) 2.86 (1 H, dd,  $J$  13.3, 6.8), 3.06 (1 H, dd,  $J$  13.3, 5.7), 3.38 (2 H, d,  $J$  7.4), 4.49 (1 H, quin,  $J$  6.5), 5.12–5.18 (1 H, m), 5.22 (1

H, dq,  $J_d$  17.0,  $J_q$  1.3), 5.87 (1 H, ddt,  $J_d$  17.0, 9.9,  $J_t$  7.3); GC-MS (EI, 70 eV)  $m/z$  (%) 266 (3,  $M^+$ ), 193 (21), 160 (9), 147 (77), 129 (54), 117 (29), 105 (85), 91 (100), 77 (39). HRMS (EI<sup>+</sup>)  $m/z$  266.0797 ( $M^+$ ); calculated mass for  $C_{14}H_{18}OS_2^+$ : 266.0799.]. Due to overlap in the high field area of the <sup>1</sup>H-NMR spectrum (1.5–2.5 ppm), signals of 3-H and 4-H of the tetrahydrofuran rings could not be assigned unequivocally to either of the three compounds (**8a**, **12**, **14**).

#### 4.2 Oxidation of *cis*-2-(prop-2-en-1-yl)cyclopentan-1-ol (**1d**)

A solution of alcohol **1d** (84.5 mg, 669 μmol) and cobalt catalyst **5** (15.0 mg, 33.1 μmol) in dimethyl disulfide (6.35 mL [99%], 70.9 mmol) and CHD (0.65 mL) was stirred at 70 °C for 6 h, while being exposed to laboratory atmosphere. The reaction mixture was cooled to 20 °C and concentrated under reduced pressure to afford a residue that was purified by column chromatography [SiO<sub>2</sub>, methyl *tert*-butyl ether/pentane = 1:10 → 1:5 (v/v)].

**rel**-(1*S*,3*R*,5*S*)-3-(methylsulfanyl)methyl-2-oxabicyclo[3.3.0]octane (**3d**). Yield: 81.9 mg (475 μmol, 71 %),  $R_f$  0.60 [SiO<sub>2</sub>, acetone/pentane = 1:5 (v/v)], colorless oil.  $\delta_H$  (400 MHz, CDCl<sub>3</sub>) 1.36–1.44 (1 H, m), 1.46–1.80 (7 H, m), 1.85 (1 H, dd,  $J$  8.2, 7.6), 2.13 (3 H, s, CH<sub>3</sub>), 2.47–2.55 (1 H, m), 2.60–2.71 (2 H, m), 4.14 (1 H, quint,  $J$  6.5), 4.51–4.56 (1 H, m).  $\delta_C$  (100 MHz, CDCl<sub>3</sub>) 16.3 (CH<sub>3</sub>), 24.7, 32.8, 34.7, 38.8, 39.1, 42.7, 78.5, 84.8. GC-MS (EI, 70 eV)  $m/z$  (%) 172 (6), 124 (1), 111 (51), 93 (7), 81 (6), 67 (100). HRMS (EI<sup>+</sup>)  $m/z$  172.0912 ( $M^+$ ); calculated mass for  $C_9H_{16}OS^+$ : 172.0922.

**rel**-(1*S*,3*S*,5*S*)-3-methyl-2-oxabicyclo[3.3.0]octane (**8d**). Yield: 926 μg (7.35 μmol, 11 %),  $R_f$  0.53 [SiO<sub>2</sub>, acetone/pentane = 1:5 (v/v)], colorless oil.  $\delta_H$  (400 MHz, CDCl<sub>3</sub>) 1.17 (1 H, d,  $J$  6.1), 1.33–1.42 (1 H, m), 1.44–1.54 (1 H, m), 1.57–1.78 (6 H, m), 2.61–2.71 (1 H, m), 4.03–4.10 (1 H, m), 4.51–4.58 (1 H, m).  $\delta_C$  (100 MHz, CDCl<sub>3</sub>) 20.6, 25.1, 34.8, 41.5, 43.1, 74.8, 84.4. GC-MS (EI, 70 eV)  $m/z$  (%) 126 (8,  $M^+$ ), 111 (80), 97 (42), 83 (7), 67 (100). HRMS (EI<sup>+</sup>)  $m/z$  126.1033 ( $M^+$ ); calculated mass for  $C_8H_{14}O^+$ : 126.1045.

#### 4.3 Oxidation of *cis*-2-(prop-2-en-1-yl)cyclohexan-1-ol (**1e**)

A solution of alcohol **1e** (140.7 mg, 1.00 mmol) and cobalt catalyst **5** (23.3 mg,



51.4  $\mu\text{mol}$ ) in dimethyl disulfide (9.5 mL [99%], 106 mmol) and CHD (1.0 mL) was stirred at 70 °C for 8 h, while being exposed to laboratory atmosphere. The reaction mixture was cooled to 20 °C and concentrated under reduced pressure to afford a residue that was purified by column chromatography [ $\text{SiO}_2$ ,  $\text{Et}_2\text{O}$ /pentane = 1:10 (v/v)].

***rel*-(1*S*,3*R*,5*S*)-3-(methylsulfanyl)-methyl-2-oxabicyclo[4.3.0]nonane (3e)**. Yield: 138.3 mg (742  $\mu\text{mol}$ , 74 %),  $R_f$  0.69 [ $\text{SiO}_2$ , acetone/pentane = 1:5 (v/v)], colorless oil.  $\delta_{\text{H}}$  (400 MHz,  $\text{CDCl}_3$ ) 1.12–1.26 (2 H, m), 1.32–1.59 (5 H, m), 1.71–1.77 (1 H, m), 1.81–1.88 (2 H, m), 2.00–2.06 (1 H, m), 2.13 (3 H, s, Me), 2.56 (1 H, dd,  $J$  13.2, 6.5), 2.67 (1 H, dd,  $J$  13.2, 5.6), 3.97 (1 H, q,  $J$  3.7), 4.30 (1 H, quin,  $J$  6.7).  $\delta_{\text{C}}$  (100 MHz,  $\text{CDCl}_3$ ) 16.3 ( $\text{CH}_3$ ), 20.5, 23.9, 27.5, 28.2, 38.1, 38.3, 40.5, 76.2, 76.8. GC-MS (EI, 70 eV)  $m/z$  (%) 186 (7,  $\text{M}^+$ ), 168 (3), 125 (40), 107 (31), 81 (100). HRMS (EI<sup>+</sup>)  $m/z$  186.1073 ( $\text{M}^+$ ); calculated mass for  $\text{C}_{10}\text{H}_{18}\text{OS}^+$ : 186.1078.

***rel*-(1*S*,3*S*,5*S*)-3-methyl-2-oxabicyclo[4.3.0]nonane (8e)**. Yield: 13.9 mg (99.1  $\mu\text{mol}$ , 10 %). Analytical data agree with published values.<sup>7a</sup>

#### 4.4 Oxidation of *rel*-(1*S*,2*R*)-1,2-diphenylpent-4-en-1,2-diol (1f)

A solution of alcohol **1f** (127 mg, 500  $\mu\text{mol}$ ) and cobalt catalyst **5** (11.5 mg, 25.4  $\mu\text{mol}$ ) in methyl disulfide (5.0 mL) and CHD (0.5 mL) was stirred at 60 °C for 5 h while being exposed to laboratory atmosphere. The reaction mixture was cooled to 20 °C and concentrated under reduced pressure to afford an oily residue that was purified by column chromatography [ $\text{SiO}_2$ ,  $\text{Et}_2\text{O}$ /pentane = 1:10 (v/v)].

***rel*-(2*S*,3*R*,5*R*)-5-(methylsulfanyl)methyl-2,3-diphenyltetrahydrofuran-3-ol (3f)**. Yield: 100 mg (334  $\mu\text{mol}$ , 67 %),  $R_f$  0.37 [ $\text{SiO}_2$ , acetone/pentane = 1:5 (v/v)], colorless oil.  $\delta_{\text{H}}$  (600 MHz,  $\text{CDCl}_3$ ) 1.78 (1 H, s, OH), 2.26 (3 H, s,  $\text{CH}_3$ ), 2.56 (1 H, d,  $J$  7.4), 2.88–2.99 (1 H, m), 4.86–4.94 (1 H, m), 5.45 (1 H, s), 7.05 (2 H, dd,  $J$  6.3, 2.7), 7.23–7.32 (4 H, m), 7.38 (2 H, t,  $J$  7.4), 7.42–7.46 (2 H, m). NOESY 2-H || 5-H.  $\delta_{\text{C}}$  (150 MHz,  $\text{CDCl}_3$ ) 16.9 ( $\text{CH}_3$ ), 39.7, 47.9, 78.4, 83.2, 89.5, 125.3, 126.6, 127.2, 128.27, 128.34, 135.5, 141.7. GC-MS (EI, 70 eV)  $m/z$  (%) 300 (<1,  $\text{M}^+$ ), 234 (3), 221 (8), 192 (8), 147 (17), 115 (10), 105 (100), 91 (8), 77 (33). HRMS (EI<sup>+</sup>)  $m/z$  282.1090 ( $\text{M}^+ - \text{H}_2\text{O}$ ); calculated mass for  $\text{C}_{18}\text{H}_{18}\text{OS}^+$ : 282.1078.

***rel*-(2*S*,3*R*,5*S*)-5-methyl-2,3-diphenyltetrahydrofuran-3-ol (8f)**. Yield: 12.9 mg (50.7  $\mu\text{mol}$ , 10 %),  $R_f$  0.42 [ $\text{SiO}_2$ , acetone/pentane = 1:5 (v/v)], colorless oil.  $\delta_{\text{H}}$  (600 MHz,  $\text{CDCl}_3$ ) 1.49 (3 H, d,  $J$  6.1), 1.74 (1 H, d,  $J$  1.8, OH), 2.21–2.27 (1 H, m),

2.52 (1 H, dd,  $J$  12.9, 5.5), 4.76–4.83 (1 H, m), 5.40 (1 H, s), 7.03–7.07 (2 H, m), 7.24–7.26 (3 H, m), 7.28–7.31 (1 H, m), 7.37 (2 H, t,  $J$  7.7), 7.40–7.44 (2 H, m).  $\delta_C$  (100 MHz,  $CDCl_3$ ) 21.5, 50.9, 75.2, 83.5, 90.0, 125.3, 126.6, 127.1, 128.1, 128.26, 128.29, 136.0, 142.1. GC-MS (EI, 70 eV)  $m/z$  (%) 254 (<1,  $M^+$ ), 236 (13), 193 (10), 178 (6), 165 (8), 148 (88), 133 (65), 115 (23), 105 (100), 91 (8), 77 (65). HRMS (EI<sup>+</sup>)  $m/z$  254.1312 ( $M^+$ ); calculated mass for  $C_{17}H_{18}O_2^+$ : 254.1307.

#### 4.5 Oxidation of 2-phenylpent-4-en-1-ol (**1g**)

A solution of alcohol **1g** (164 mg, 1.01 mmol) and cobalt catalyst **5** (22.9 mg, 50.5  $\mu$ mol) in dimethyl disulfide (9.5 mL [99%], 106 mmol) and CHD (1.0 mL) was stirred at 70 °C for 6 h, while being exposed to laboratory atmosphere. The reaction mixture was cooled to 20 °C and concentrated under reduced pressure to afford a residue that was purified by column chromatography [ $SiO_2$ ,  $Et_2O$ /pentane = 1:10 (v/v)].

**cis-2-(methylsulfonyl)methyl-4-phenyltetrahydrofuran (3g)**. Yield: 144 mg (692  $\mu$ mol, 68 %, *cis:trans* 88:12),  $R_f$  0.48 [ $SiO_2$ , acetone/pentane = 1:5 (v/v)], colorless oil.  $\delta_H$  (400 MHz,  $CDCl_3$ ) 1.84 (1 H, dt,  $J_d$  12.3,  $J_t$  10.0), 2.20 (3 H, s,  $CH_3$ ), 2.53 (1 H, ddd,  $J$  12.3, 7.2, 5.8), 2.71–2.77 (1 H, m), 2.78–2.85 (1 H, m), 3.44–3.55 (1 H, m), 3.84 (1 H, t,  $J$  8.3), 4.19 (1 H, t,  $J$  8.3), 4.23–4.31 (1H, m), 7.19–7.36 (5 H, m). NOESY 2-H  $\leftrightarrow$  4-H.  $\delta_C$  (100 MHz,  $CDCl_3$ ) 16.4 ( $CH_3$ , *trans*), 16.5 ( $CH_3$ , *cis*), 39.1 (*trans*), 39.4 (*cis*), 39.7 (*trans*), 40.3 (*cis*), 44.5 (*trans*), 45.6 (*cis*), 74.5 (*cis*), 74.8 (*trans*), 78.5 (*trans*), 79.6 (*cis*), 126.6, 127.2, 128.6, 141.8 (*cis*), 142.1 (*trans*). GC-MS (EI, 70 eV)  $m/z$  (%) 208 (15,  $M^+$ ), 190 (4), 147 (52), 129 (39), 115 (14), 103 (10), 91 (100), 77 (14). HRMS (EI<sup>+</sup>)  $m/z$  208.0928 ( $M^+$ ); calculated mass for  $C_{12}H_{16}OS^+$ : 208.0922.

**cis-2-methyl-4-phenyltetrahydrofuran (8g)**. Yield: 27.3 mg (168  $\mu$ mol, 17 %). Analytical data agree with published values.<sup>2,9</sup>

#### 4.6 Oxidation of *rel*-(1*S*,2*S*)-1-phenylpent-4-en-1,2-diol (**1h**)

A solution of alcohol **1h** (89.2 mg, 500  $\mu$ mol) and cobalt catalyst **5** (11.6 mg, 25.6  $\mu$ mol) in dimethyl disulfide (5.0 mL [99%], 55.8 mmol) and CHD (0.5 mL) was stirred at 70 °C for 6 h while being exposed to laboratory atmosphere. The reaction mixture was cooled to 20 °C. A GC-MS-spectrum revealed that Benzaldehyde (70 %) was the major product.

#### 4.7 Oxidation of *rel*-(1*R*,2*R*)-1,2-diphenylpent-4-en-1-ol (**1i**)

A solution of alcohol **1i** (120 mg, 504  $\mu\text{mol}$ ) and cobalt catalyst **5** (11.6 mg, 25.6  $\mu\text{mol}$ ) in dimethyl disulfide (5.0 mL [99%], 55.8 mmol) and CHD (0.5 mL) was stirred at 70 °C for 8 h while being exposed to laboratory atmosphere. The reaction mixture was cooled to 20 °C and concentrated under reduced pressure to afford a residue that was purified by column chromatography [ $\text{SiO}_2$ ,  $\text{Et}_2\text{O}$ /pentane = 1:10 (v/v)].

*rel*-(2*R*,4*R*,5*R*)-2-(methylsulfanyl)methyl-4,5-diphenyltetrahydrofuran (**3i**). Yield: 103 mg (360  $\mu\text{mol}$ , 72 %),  $R_f$  0.42 [ $\text{SiO}_2$ , acetone/pentane = 1:5 (v/v)], colorless oil.  $\delta_{\text{H}}$  (400 MHz,  $\text{CDCl}_3$ ) 2.26 (3 H, s,  $\text{CH}_3$ ), 2.30–2.39 (1 H, m), 2.47–2.57 (1 H, m), 2.78–2.85 (1 H, m), 2.74–2.83 (1 H, m), 2.87–2.95 (1 H, m), 3.78 (1 H, q,  $J$  6.7), 4.83 (1 H, quint,  $J$  6.3), 5.37 (1 H, d,  $J$  6.3), 6.85–6.97 (4 H, m), 7.02–7.12 (6 H, m). NOESY 2-H  $\leftrightarrow$  3-H, 2-H || 5-H, 3-H || 5-H.  $\delta_{\text{C}}$  (100 MHz,  $\text{CDCl}_3$ ) 16.5 ( $\text{CH}_3$ ), 37.2, 40.3, 50.2, 78.4, 84.1, 126.3, 126.6, 127.4, 127.7, 128.5, 139.3, 139.6. HRMS ( $\text{EI}^+$ )  $m/z$  284.1209 ( $\text{M}^+$ ); calculated mass for  $\text{C}_{18}\text{H}_{20}\text{OS}^+$ : 284.1235.

*rel*-(2*R*,3*R*,5*S*)-5-methyl-2,3-diphenyltetrahydrofuran (**8i**). Yield: 8.72 mg (36.6  $\mu\text{mol}$ , 7 %),  $R_f$  0.45 [ $\text{SiO}_2$ , acetone/pentane = 1:5 (v/v)], colorless oil.  $\delta_{\text{H}}$  (400 MHz,  $\text{CDCl}_3$ ) 1.44 (3 H, d,  $J$  6.3), 2.09 (1 H, ddd,  $J$  12.7, 7.4, 5.3), 2.51 (1 H, ddd,  $J$  13.0, 7.4, 6.3), 3.78 (1 H, q,  $J$  6.6), 4.78–4.88 (1 H, m), 5.36 (1 H, d,  $J$  6.3), 6.85–6.98 (4 H, m), 7.03–7.13 (6 H, m).  $\delta_{\text{C}}$  (100 MHz,  $\text{CDCl}_3$ ) 22.9, 39.3, 50.3, 74.9, 83.5, 126.1, 126.3, 126.5, 127.4, 127.7, 128.5, 139.7, 139.9. HRMS ( $\text{EI}^+$ )  $m/z$  238.1364 ( $\text{M}^+$ ); calculated mass for  $\text{C}_{17}\text{H}_{18}\text{O}^+$ : 238.1358.

#### 4.8 Oxidation of *rel*-(1*R*,2*R*)-1,2-diphenylhex-5-en-1-ol (**15**)

A solution of alcohol **15** (169 mg, 669  $\mu\text{mol}$ ) and cobalt catalyst **5** (15.1 mg, 33.3  $\mu\text{mol}$ ) in methyl disulfide (6.6 mL) and CHD (0.65 mL) was stirred at 70 °C for 16 h while being exposed to laboratory atmosphere. Another batch of cobalt catalyst **5** (15.2 mg, 33.5  $\mu\text{mol}$ ) and CHD (0.65 mL) were added and the reaction mixture was stirred another 6 h at 70 °C. The reaction mixture was cooled to 20 °C and concentrated under reduced pressure to afford a residue that was purified by column chromatography [ $\text{SiO}_2$ ,  $\text{Et}_2\text{O}$ /pentane = 1:10 (v/v)].

*rel*-(2*R*,3*R*,6*R*)-6-(methylsulfanyl)-methyl-2,3-diphenyltetrahydropyran (**16**). Yield: 134 mg (450  $\mu\text{mol}$ , 67 %),  $R_f$  0.51 [ $\text{SiO}_2$ , acetone/pentane = 1:5 (v/v)], colorless oil.  $\delta_{\text{H}}$  (400 MHz,  $\text{CDCl}_3$ ) 1.57–1.72 (2 H, m), 1.84–1.93 (1 H, m), 1.95–2.04 (1 H, m), 2.09 (3

H, s, CH<sub>3</sub>), 2.55 (1 H, dd, *J* 13.3, 7.2), 2.69 (1 H, dd, *J* 13.3, 5.1), 3.92 (1 H, d, *J* 8.1), 4.16 (1 H, quin, *J* 6.6), 4.75 (1 H, dt, *J<sub>d</sub>* 8.1, *J<sub>t</sub>* 6.0), 7.13–7.19 (2 H, m), 7.21–7.28 (6 H, m), 7.32–7.36 (2 H, m). NOESY 2-H ↔ 3-H, 2-H || 6-H, 3-H || 6-H. δ<sub>C</sub> (100 MHz, CDCl<sub>3</sub>) 16.4 (CH<sub>3</sub>), 31.2, 31.3, 39.3, 56.8, 79.1, 81.1, 126.1, 126.3, 128.1, 128.3, 128.5, 128.7, 142.4, 142.9. GC-MS (EI, 70 eV) *m/z* (%) 298 (<1, M<sup>+</sup>), 237 (1), 193 (5), 178 (5), 165 (21), 152 (12), 131 (100), 115 (8), 103 (20), 87 (20). HRMS (EI<sup>+</sup>) *m/z* 298.1384 (M<sup>+</sup>); calculated mass for C<sub>19</sub>H<sub>22</sub>OS: 298.1391.

***rel*-(2*R*,3*R*,6*S*)-6-methyl-2,3-diphenyltetrahydropyran (17).** Yield: 15.4 mg (61.0 μmol, 9%), *R<sub>f</sub>* 0.56 [SiO<sub>2</sub>, acetone/pentane = 1:5 (v/v)], colorless oil. δ<sub>H</sub> (400 MHz, CDCl<sub>3</sub>) 1.21 (3 H, d, *J* 6.1), 1.39–1.49 (1 H, m), 1.58–1.68 (1 H, m), 1.85–2.00 (1 H, m), 3.92 (1 H, d, *J* 8.4), 4.09 (1 H, quint, *J<sub>quint</sub>* 7.9, *J<sub>d</sub>* 6.1), 4.76 (1 H, dt, *J<sub>d</sub>* 8.4, *J<sub>t</sub>* 6.2), 7.14–7.19 (2 H, m), 7.23–7.29 (6 H, m), 7.33–7.37 (1 H, m). δ<sub>C</sub> (100 MHz, CDCl<sub>3</sub>) 21.4, 31.6, 33.6, 57.0, 75.3, 80.4, 126.1, 126.3, 128.2, 128.4, 128.6, 128.7, 142.8, 143.1. GC-MS (EI, 70 eV) *m/z* (%) 252 (<1, M<sup>+</sup>), 178 (3), 165 (17), 152 (7), 115 (5), 85 (100), 77 (3). HRMS (EI<sup>+</sup>) *m/z* 252.1515 (M<sup>+</sup>); calculated mass for C<sub>18</sub>H<sub>20</sub>O: 252.1514.

## 5 5-Phenyltetrahydrofuryl-2-methyl methyl sulfoxide (9)

A solution of *tert*-butyl hydroperoxide (0.25 mL, 0.5–0.6 M, in nonane/CHCl<sub>3</sub>) was added under nitrogen atmosphere to a solution of 2-[(2-oxidophenyl)-iminomethyl](ethanolato)oxidovanadium(V)<sup>14</sup> (10.7 mg, 29.0 μmol) in CHCl<sub>3</sub> (2.0 mL). The mixture was briefly refluxed (5 min), a solution of *trans*-2-(methylsulfanyl)methyl-5-phenyltetrahydrofuran (**3a**) (59.7 mg, 289 μmol) in CHCl<sub>3</sub> (2.0 mL) was added to the warm solution and the reaction mixture was stirred at 22 °C for 48 h. The dark brown solution was filtrated through a short pad of neutral Al<sub>2</sub>O<sub>3</sub> for removing the vanadium residues. The filtrate was concentrated under reduced pressure to leave an oil, which was purified by flash chromatography (SiO<sub>2</sub>, acetone). Yield: 42.4 mg, 189 μmol, 66 %, *R*<sub>f</sub> 0.12 [SiO<sub>2</sub>, acetone], colorless oil, 50/50 mixture of diastereomers with respect to configuration at sulfur. δ<sub>H</sub> (400 MHz, CDCl<sub>3</sub>) 1.76–2.03 (4 H, m), 2.26–2.35 (2 H, m), 2.37–2.46 (2 H, m), 2.66 (3 H, s, CH<sub>3</sub>), 2.70 (3 H, s, CH<sub>3</sub>), 2.92–3.09 (4 H, m), 4.61–4.74 (2 H, m), 5.06 (2 H, dt, *J*<sub>d</sub> 8.1, *J*<sub>t</sub> 6.1), 7.21–7.27 (2 H, m), 7.28–7.35 (8 H, m). δ<sub>C</sub> (100 MHz, CDCl<sub>3</sub>) 32.3, 32.7, 35.0, 38.9, 39.8, 58.8, 61.6, 73.2, 73.4, 80.8, 81.1, 125.4, 127.3, 128.31, 128.33, 142.6, 142.7. HRMS (EI<sup>+</sup>) *m/z* 224.0834 (M<sup>+</sup>) respectively 224.0821 (M<sup>+</sup>); calculated mass for C<sub>12</sub>H<sub>16</sub>O<sub>2</sub>S<sup>+</sup>: 224.0871. The intensity of the molecular ion in HRMS spectra of the two diastereomeric sulfoxides was very weak. Since the retention times (GC) of the sulfoxide diastereomers differ from derived thioether *trans*-**3a**, the fragments at *m/z* 208.0919 (diastereomer 1) and *m/z* 208.0916 (diastereomer 2), originating from a formal loss of oxygen (calculated mass for C<sub>12</sub>H<sub>16</sub>OS<sup>+</sup>: 208.0922) was used to characterize the sulfoxide stereoisomers of **9**.

## 6 5-Phenyltetrahydrofuryl-2-methyl methyl sulfone (10)

A solution of *tert*-butyl hydroperoxide (0.1 mL, 5–6 M, in nonane) was added under nitrogen atmosphere to a solution of 2-[(2-oxidophenyl)iminomethyl]-(ethanolato)oxidovanadium(V)<sup>14</sup> (18.2 mg, 49.3 μmol) in CHCl<sub>3</sub> (2.5 mL). The mixture was briefly refluxed (5 min), a solution of *trans*-2-(methylsulfanyl)methyl-5-phenyltetrahydrofuran (**3a**) (104 mg, 497 μmol) in CHCl<sub>3</sub> (2.5 mL) was added to the warm solution and the reaction mixture was stirred at 22 °C for 48 h. The dark brown solution was filtrated through a short pad of neutral Al<sub>2</sub>O<sub>3</sub> for removing the vanadium residues. The filtrate was concentrated under reduced pressure to leave an oil, which was purified by flash chromatography [SiO<sub>2</sub>, acetone/CH<sub>2</sub>Cl<sub>2</sub> = 1/40 (v/v)]. Yield: 89.5 mg, 372 μmol, 75 %, *R*<sub>f</sub> 0.43 [SiO<sub>2</sub>, acetone/CH<sub>2</sub>Cl<sub>2</sub> = 1:40 (v/v)], colorless oil. δ<sub>H</sub> (400 MHz, CDCl<sub>3</sub>) 1.79–1.96 (2 H, m), 2.29–2.36 (1 H, m), 2.39–2.47 (1 H, m), 3.06 (3 H, s, CH<sub>3</sub>), 3.33 (1 H, dd, *J* 14.7, 9.1), 4.73 (1 H, tdd, *J*<sub>t</sub> 8.6, *J*<sub>d</sub> 6.0, 2.5), 5.08 (1 H, dd, *J* 8.5, 6.1), 7.25–7.37 (5 H, m). δ<sub>C</sub> (100 MHz, CDCl<sub>3</sub>) 32.5, 34.9, 42.6, 60.3, 74.0, 81.2, 125.2, 127.4, 128.5, 142.5. HRMS (EI<sup>+</sup>) *m/z* 240.0814 (M<sup>+</sup>); calculated mass for C<sub>12</sub>H<sub>16</sub>O<sub>3</sub>S<sup>+</sup>: 240.0820.

## 7. Library of carbon-13 NMR spectra of selected compounds

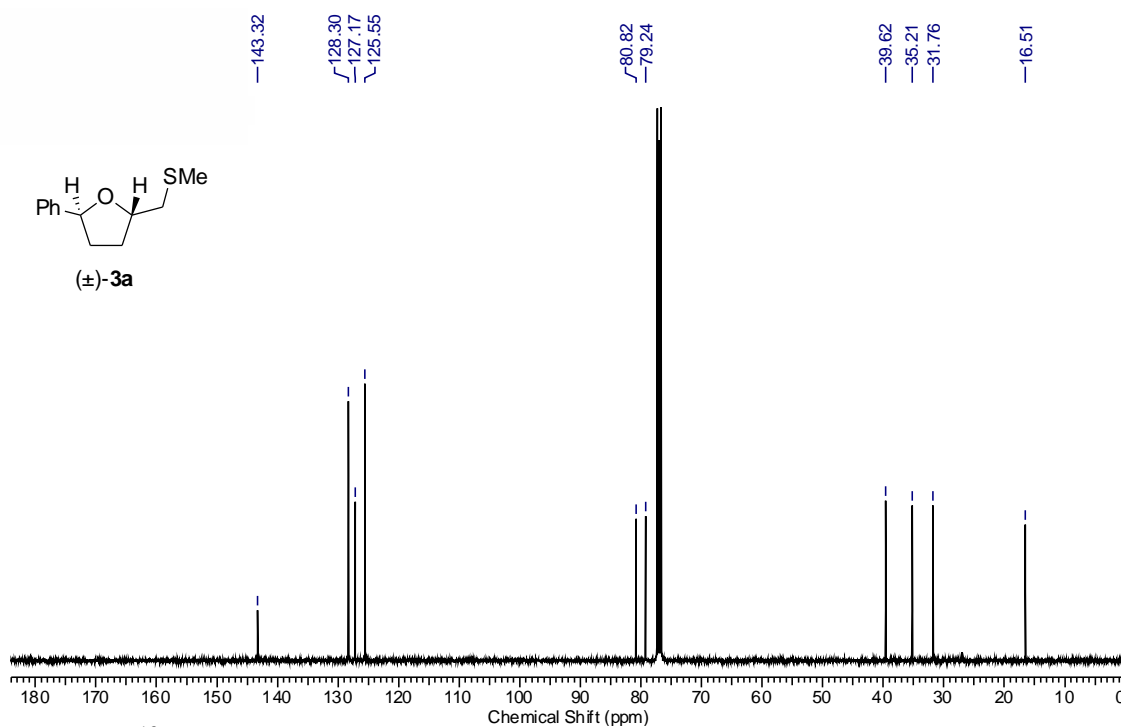

**Figure S1:**  $^{13}\text{C}$ -NMR spectrum (150 MHz,  $\text{CDCl}_3$ ) of *trans*-2-(methylsulfonyl)methyl-5-phenyltetrahydrofuran (**3a**).

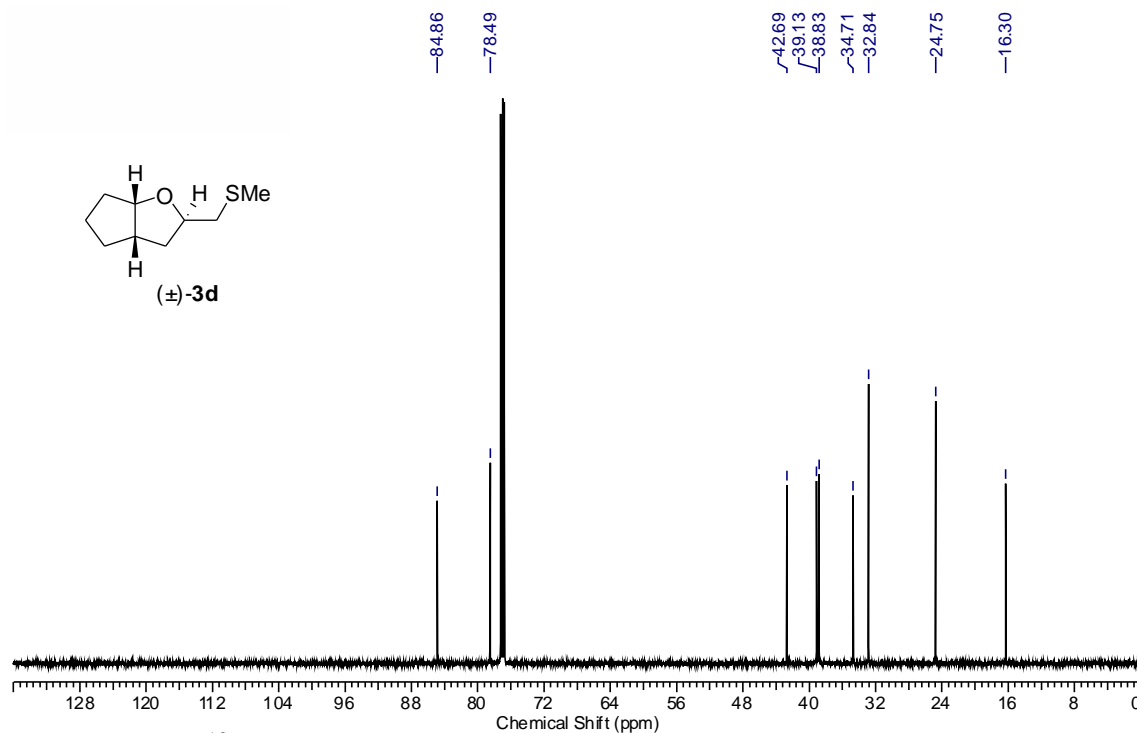

**Figure S2:**  $^{13}\text{C}$ -NMR spectrum (150 MHz,  $\text{CDCl}_3$ ) of *rel*-(1*S*,3*R*,5*S*)-3-(methylsulfonyl)methyl-2-oxabicyclo[3.3.0]octane (**3d**).

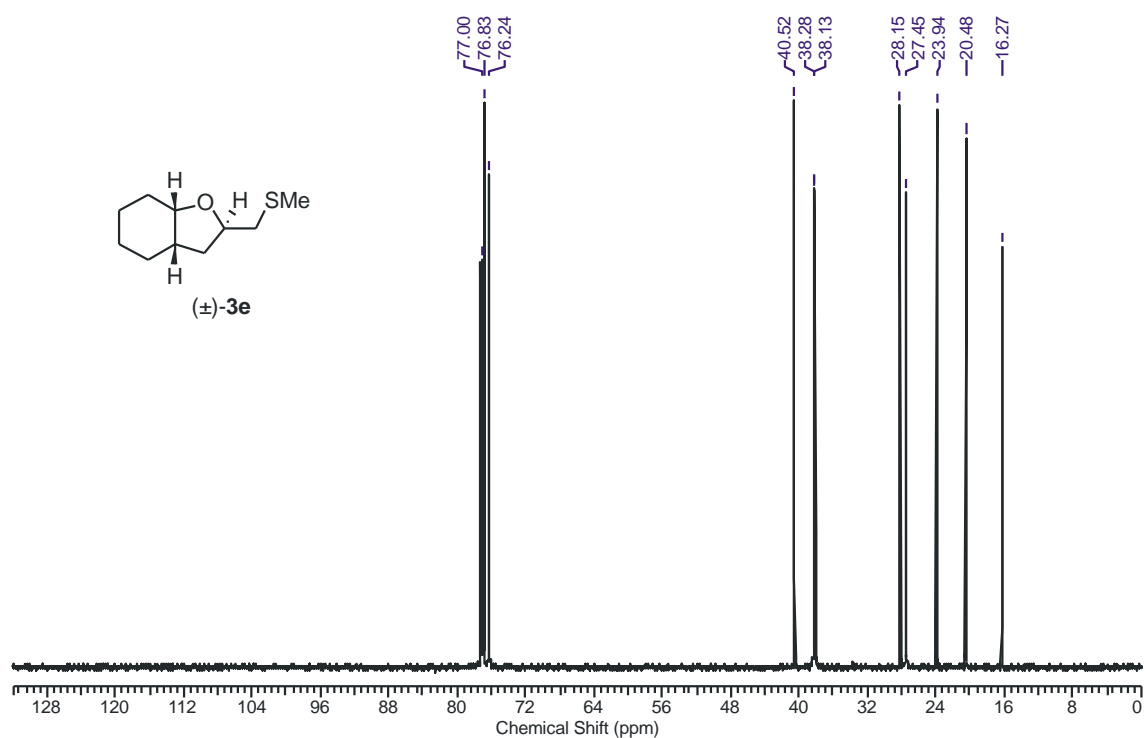

**Figure S3.** <sup>13</sup>C-NMR spectrum (150 MHz, CDCl<sub>3</sub>) of *rel*-(1*S*,3*R*,5*S*)-3-(methylsulfanyl)methyl-2-oxabicyclo[4.3.0]nonane (**3e**).

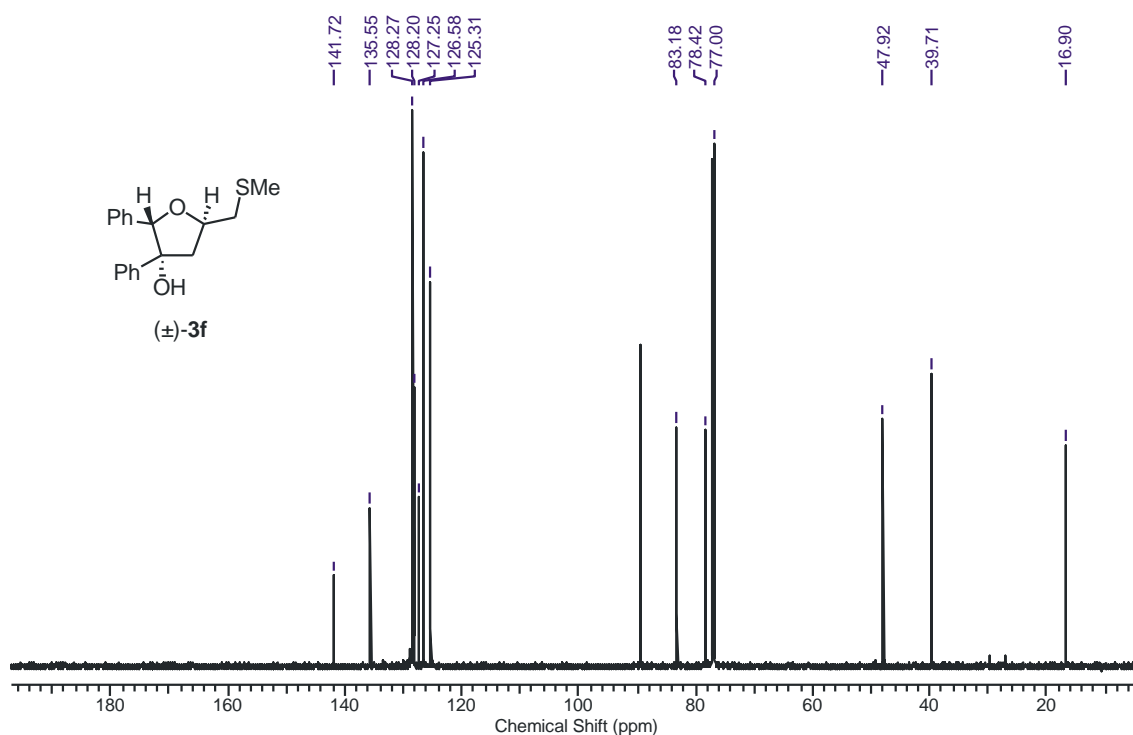

**Figure S4.** <sup>13</sup>C-NMR spectrum (150 MHz, CDCl<sub>3</sub>) of *rel*-(2*S*,3*R*,5*R*)-5-(methylsulfanyl)methyl-2,3-diphenyltetrahydrofuran-3-ol (**3f**).



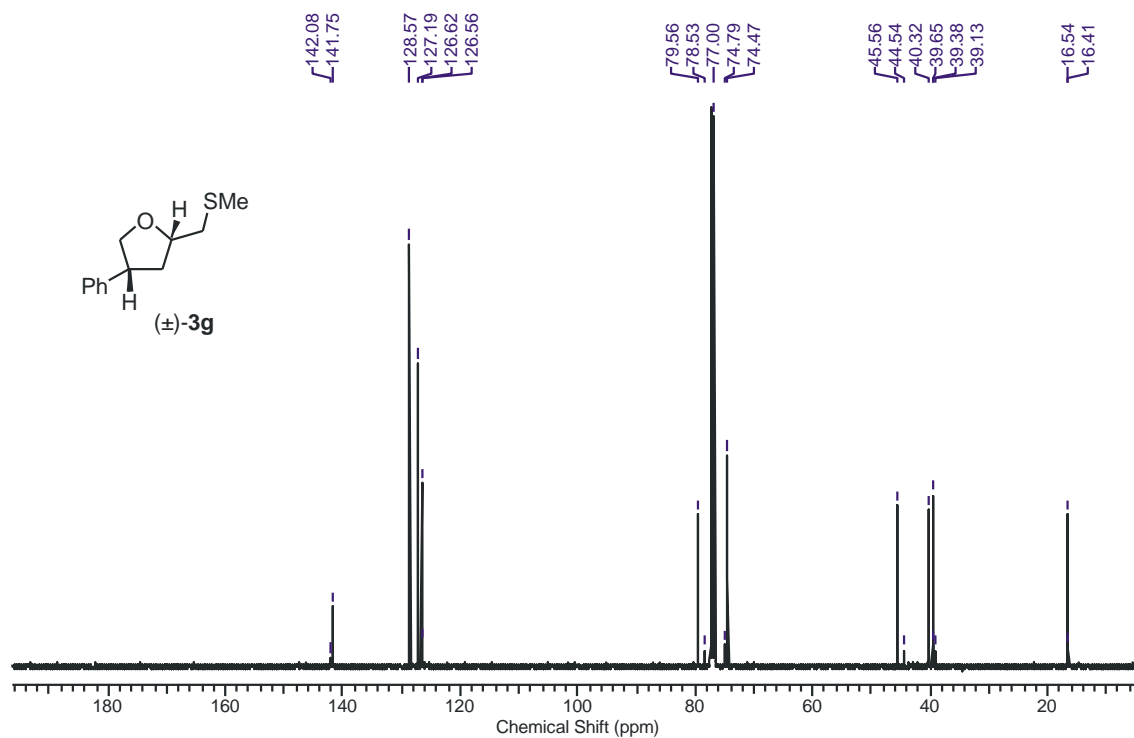

**Figure S5.**  $^{13}\text{C}$ -NMR spectrum (100 MHz,  $\text{CDCl}_3$ ) of *cis*-2-(methylsulfanyl)methyl-4-phenyltetrahydrofuran (**3g**).

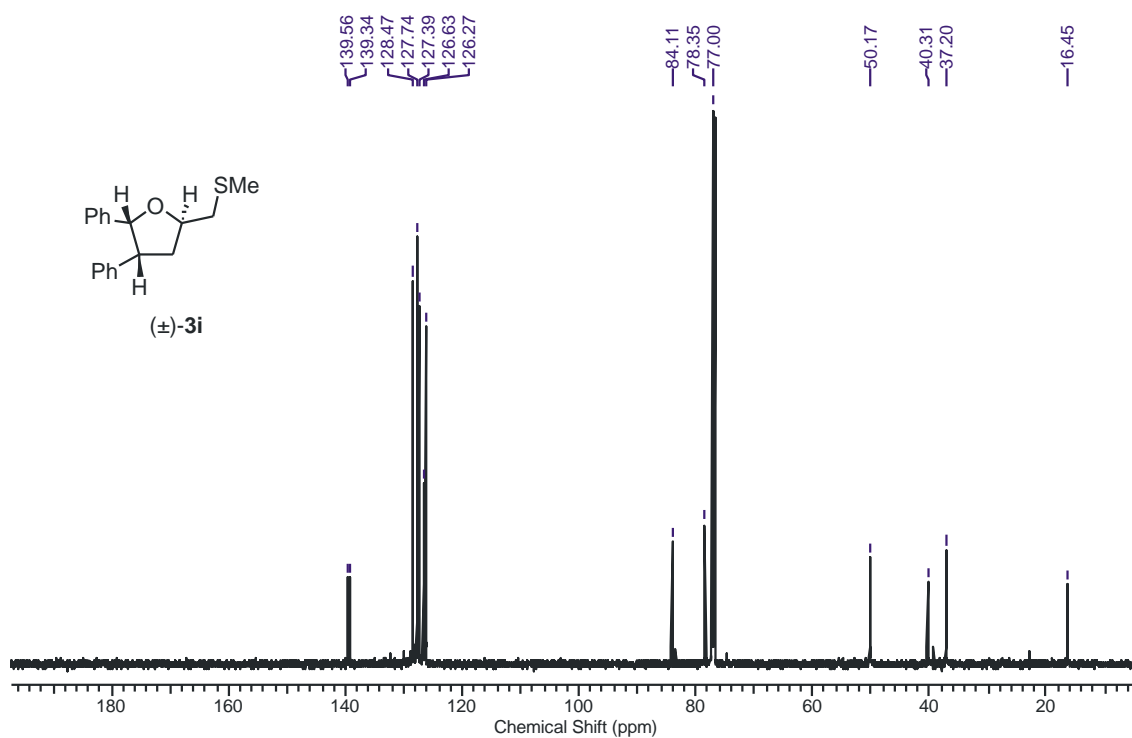

**Figure S6.**  $^{13}\text{C}$ -NMR spectrum (150 MHz,  $\text{CDCl}_3$ ) of *rel*-(2*R*,4*R*,5*R*)-2-(methylsulfanyl)methyl-4,5-diphenyltetrahydrofuran (**3i**).

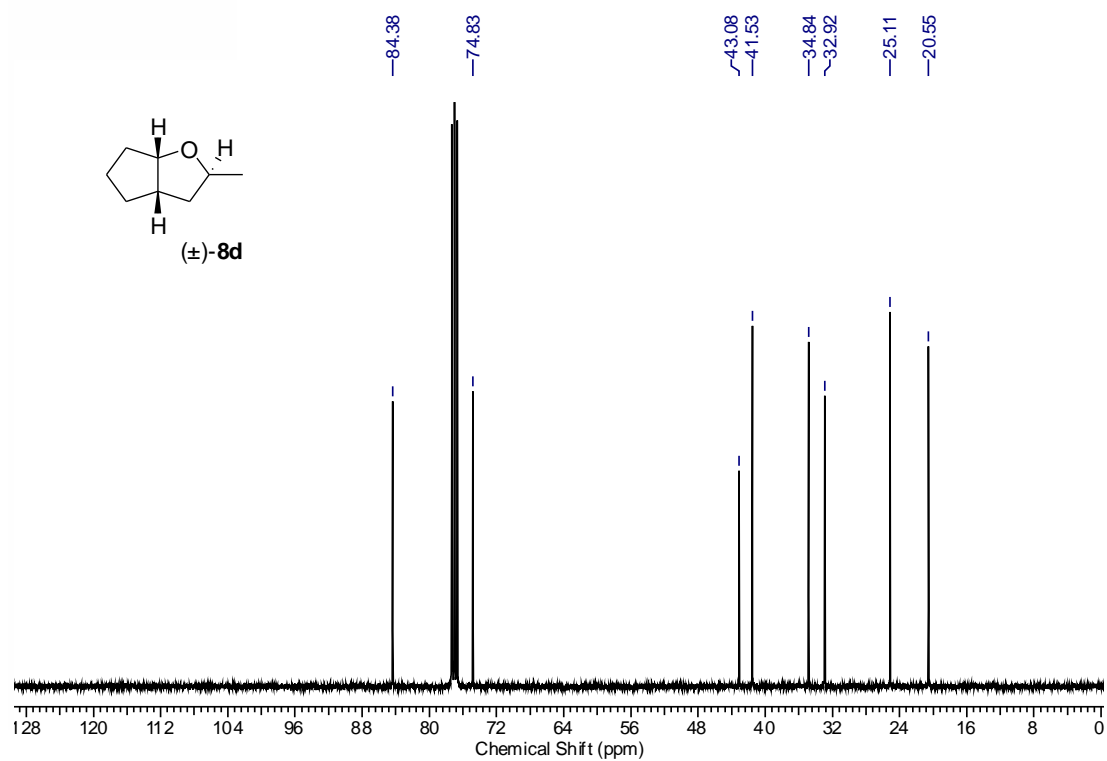

**Figure S7.**  $^{13}\text{C}$ -NMR spectrum (100 MHz,  $\text{CDCl}_3$ ) of *rel*-(1*S*,3*S*,5*S*)-3-Methyl-2-oxabicyclo[3.3.0]octane (**8d**).

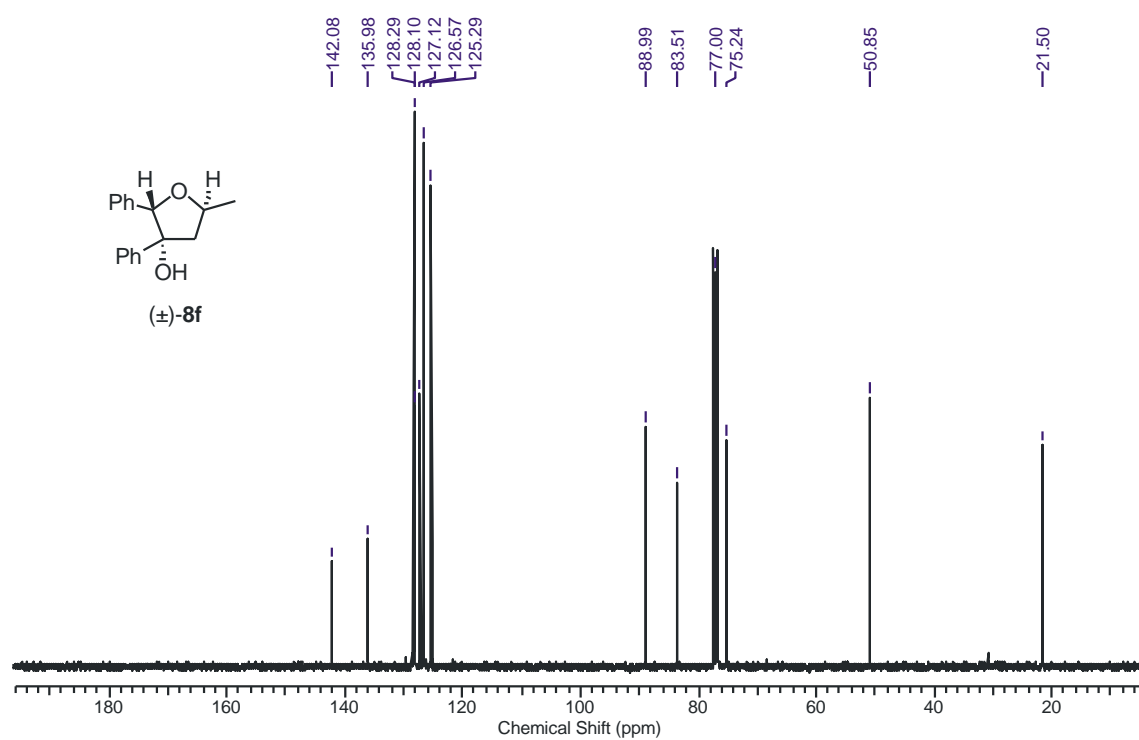

**Figure S8.**  $^{13}\text{C}$ -NMR spectrum (100 MHz,  $\text{CDCl}_3$ ) of *rel*-(2*S*,3*R*,5*S*)-5-methyl-2,3-diphenyltetrahydrofuran-3-ol (**8f**).

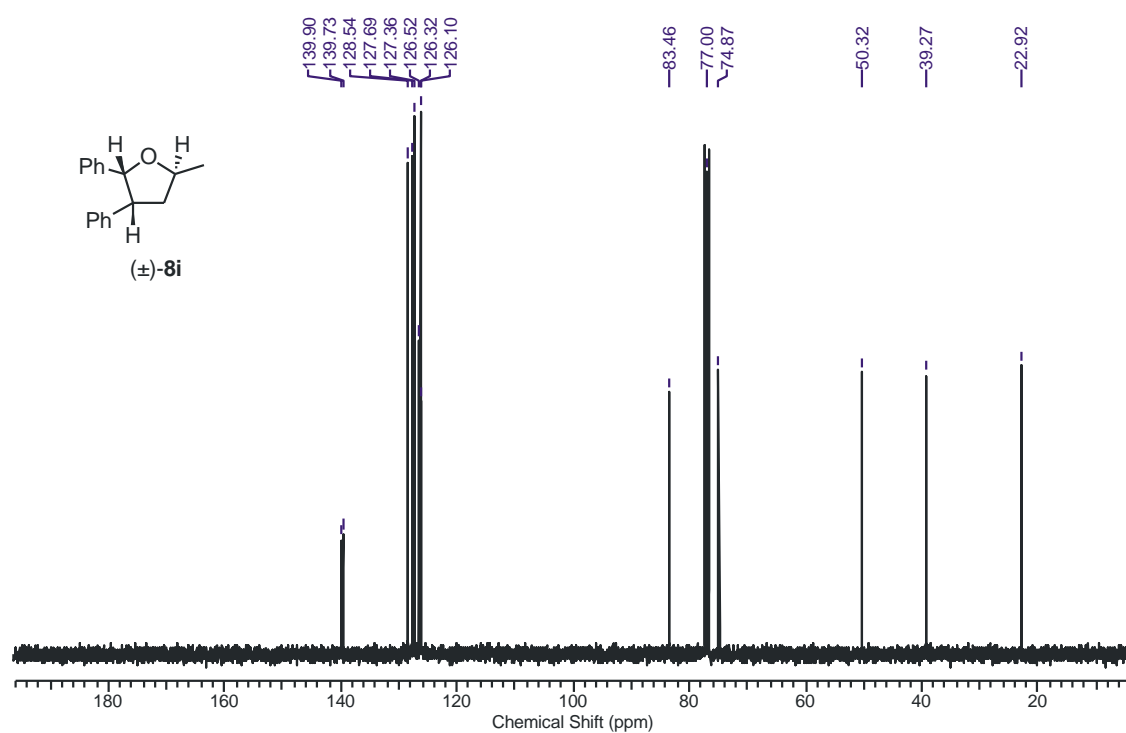

**Figure S9.** <sup>13</sup>C-NMR spectrum (100 MHz, CDCl<sub>3</sub>) of *rel*-(2*R*,3*R*,5*S*)-5-methyl-2,3-diphenyltetrahydrofuran (**8i**).

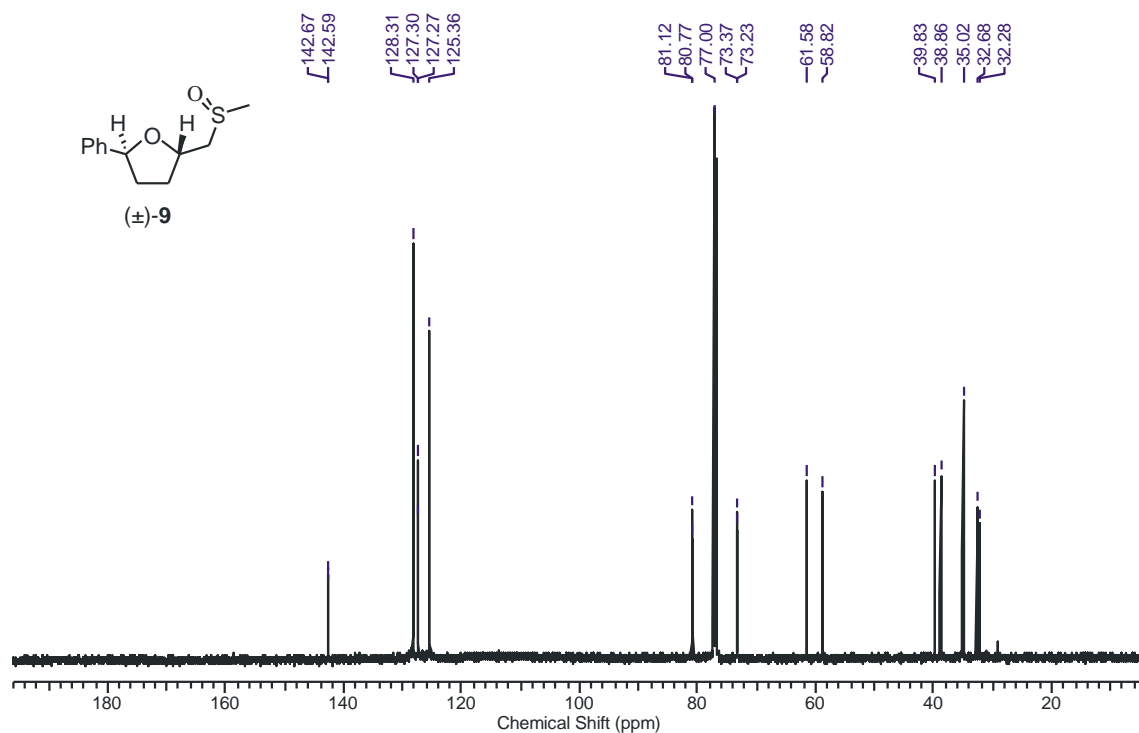

**Figure S10.** <sup>13</sup>C-NMR spectrum (100 MHz, CDCl<sub>3</sub>) of (5-Phenyltetrahydrofuryl)-2-methyl methyl sulfoxide (**9**) (50/50-mixture of stereoisomers at sulfur).

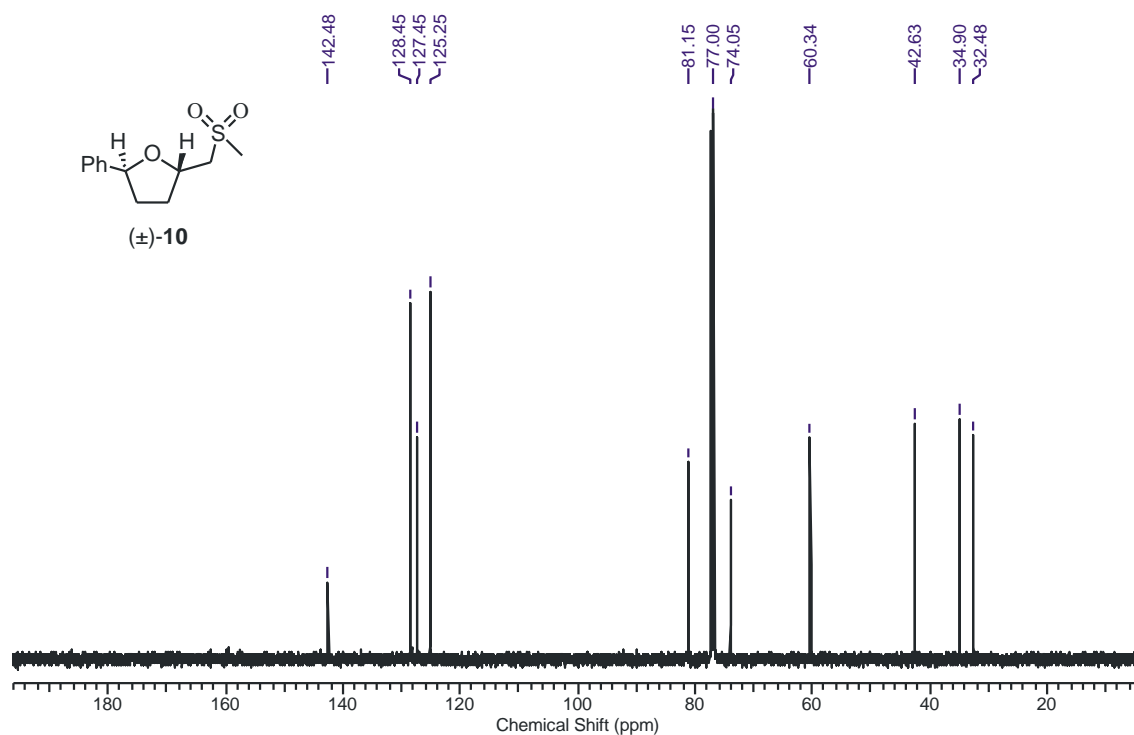

**Figure S11:** <sup>13</sup>C-NMR spectrum (150 MHz, CDCl<sub>3</sub>) of (5-phenyltetrahydrofuryl)-2-methyl methyl sulfone (**10**).

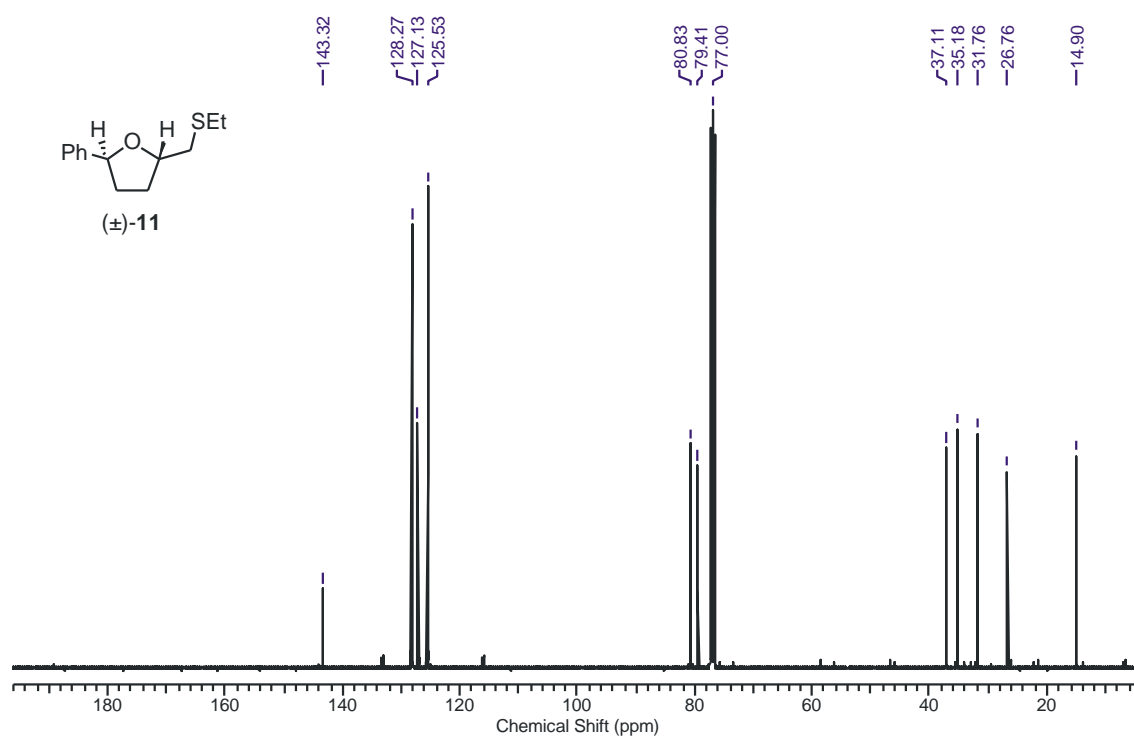

**Figure S12:** <sup>13</sup>C-NMR spectrum (100 MHz, CDCl<sub>3</sub>) of *trans*-2-(ethylsulfanyl)methyl-5-phenyltetrahydrofuran (**11**).

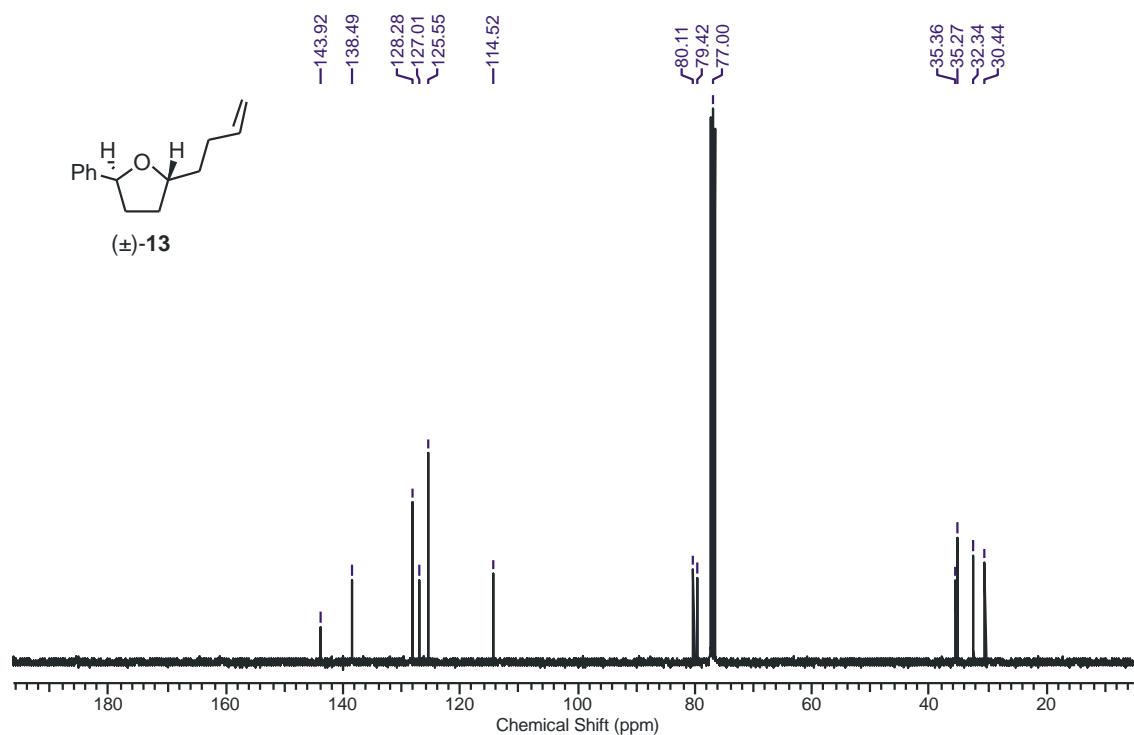

**Figure S13.**  $^{13}\text{C-NMR}$  spectrum (100 MHz,  $\text{CDCl}_3$ ) of *trans*-2-(but-1-en-4-yl)-5-phenyltetrahydrofuran (**13**).

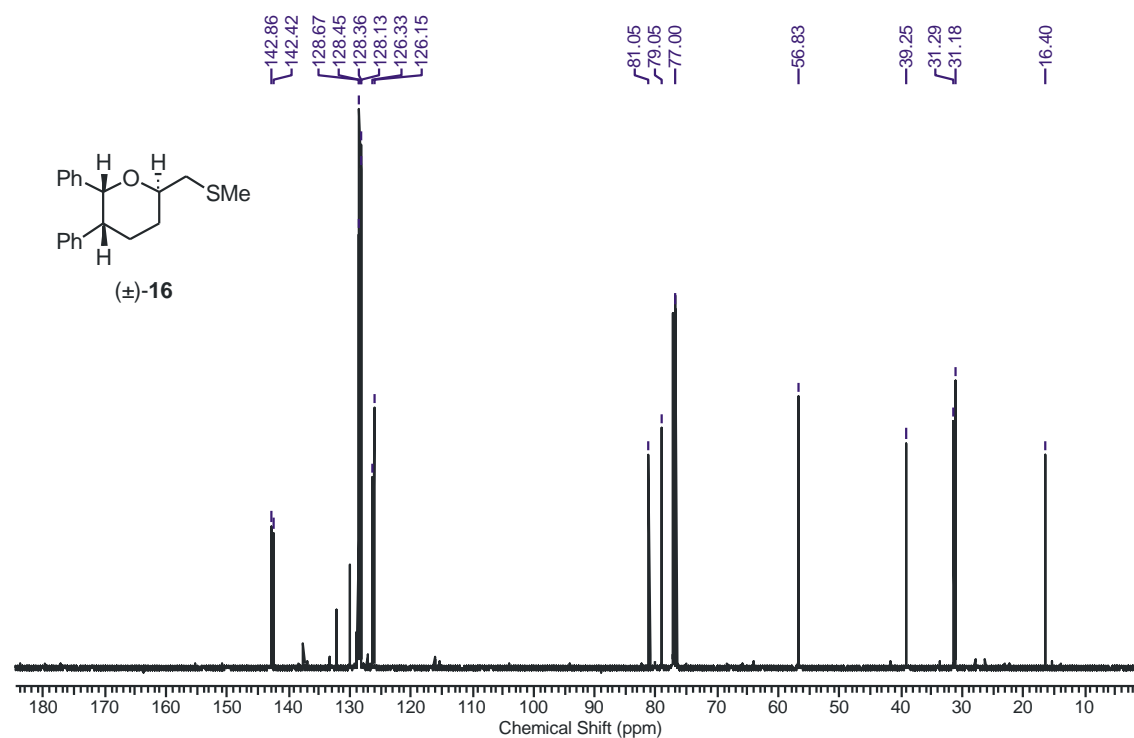

**Figure S14.**  $^{13}\text{C-NMR}$  spectrum (150 MHz,  $\text{CDCl}_3$ ) of *rel*-(2*R*,3*R*,6*R*)-6-(methylsulfanyl)-methyl-2,3-diphenyltetrahydropyran (**16**).

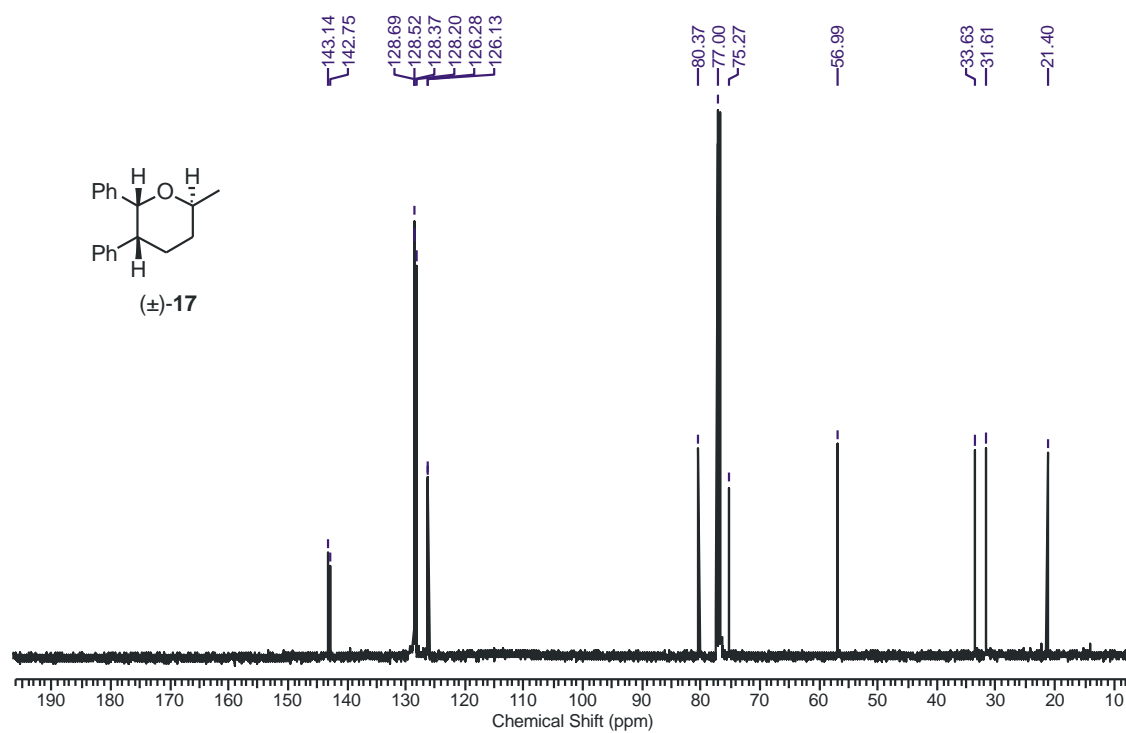

**Figure S15.** <sup>13</sup>C-NMR spectrum (100 MHz, CDCl<sub>3</sub>) of *rel*-(2*R*,3*R*,6*S*)-6-methyl-2,3-diphenyltetrahydropyran (**17**).

## 8 References

- 1 D. D. Perrin, W. L. F. Armarego, *Purification of Laboratory Chemicals*, Pergamon Press, Oxford, **1980**.
- 2 J. Hartung, M. Hiller, P. Schmidt, *Chem. Eur. J.*, **1996**, *2*, 1014–1023.
- 3 (a) V. H. Rawal, S. P. Singh, C. Dufour, C. Michoud, *J. Org. Chem.*, **1993**, *58*, 7718–7727. (b) J. P. Michael, M. M. Nkwelo, *Tetrahedron*, **1990**, *46*, 2549–2560.
- 4 D. Schuch, P. Fries, M. Dönges, B. Menéndez Pérez, J. Hartung, *J. Am. Chem. Soc.* **2009**, *131*, 12918–12920.
- 5 M. Kimura, A. Ezoe, K. Mori, K. Iwata, Y. Tamaru, *J. Am. Chem. Soc.*, **2006**, *128*, 8559–8568.
- 6 J. Hartung, I. Kempter, T. Gottwald, M. Schwarz, R. Kneuer, *Tetrahedron: Asymmetry*, **2009**, *20*, 2097–2104.
- 7 (a) V. Spéziale, M. M. Amat, A. Lattes, *J. Heterocycl. Chem.*, **1976**, *13*, 349–355. (b) M. B. Hay, A. R. Hardin, J. P. Wolfe, *J. Org. Chem.*, **2005**, *70*, 3099–3107. (c) Y.-S. Hon, Y.-W. Liu, C.-H. Hsieh, *Tetrahedron*, **2004**, *60*, 4837–4860.
- 8 K. Sato, M. Kira, H. Sakurai, *J. Am. Chem. Soc.*, **1989**, *111*, 6429–6431.
- 9 (a) J. Iqbal, R. R. Srivastava, *Tetrahedron*, **1991**, *47*, 3155–3170. (b) A. J. Bloodworth, J. L. Courtneidge, R. J. Curtis, M. D. Spencer, *J. Chem. Soc. Perkin Trans.*, **1990**, 2951–2955.
- 10 (a) H. C. Kolb, M. S. Van Nieuwenhze, K. B. Sharpless, *Chem. Rev.*, **1994**, *94*, 2483–2547. (b) K. B. Sharpless, W. Amberg, Y. L. Bennani, G. A. Crispino, J. Hartung, K. Jeong, H. Kwong, K. Morikawa, Z. Wang, D. Xu, X. Zhang, *J. Org. Chem.*, **1992**, *57*, 2768–2771.
- 11 N. Minowa, T. Mukaiyama, *Bull. Chem. Soc. Jap.*, **1987**, *60*, 3697–3704.
- 12 P. Fries, D. Halter, A. Kleinschek, J. Hartung, *J. Am. Chem. Soc.*, **2011**, *133*, 3906–3912.
- 13 J. Hartung, R. Kneuer, S. Laug, P. Schmidt, K. Špehar, I. Svoboda, H. Fuess, *Eur. J. Org. Chem.*, **2003**, 4033–4052.
- 14 H. Mimoun, M. Mignard, P. Brechot, L. Saussine, *J. Am. Chem. Soc.* **1986**, *108*, 3711–3718.
